# Supplementary material for: Serial rotational thromboelastography (ROTEM) in mechanically ventilated patients with COVID-19 demonstrates hypercoagulopathy despite therapeutic heparinization
Source: PubMed Central journal article supplement — Trauma Surg Acute Care Open. 2022 Mar 10;7(1):e000603. doi: 10.1136/tsaco-2020-000603 (PMC8914399; doi:10.1136/tsaco-2020-000603), 2022-03-10

**Supplemental Figure 3:**

Partial Thromboplastin Time in Patients with and without Hypercoagulable Complications

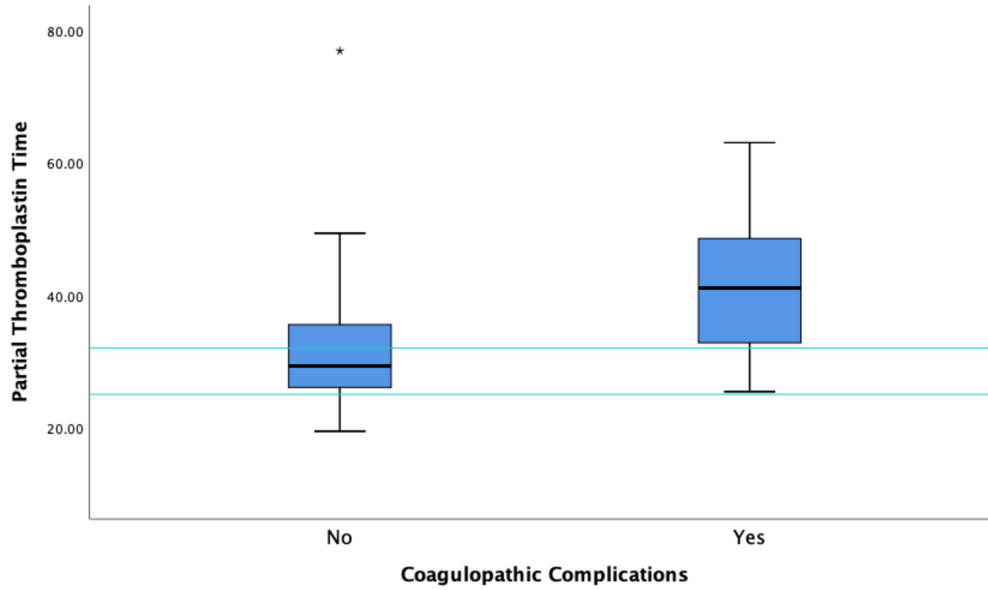

Partial Thromboplastin Time in Patients with and without Therapeutic Heparinization

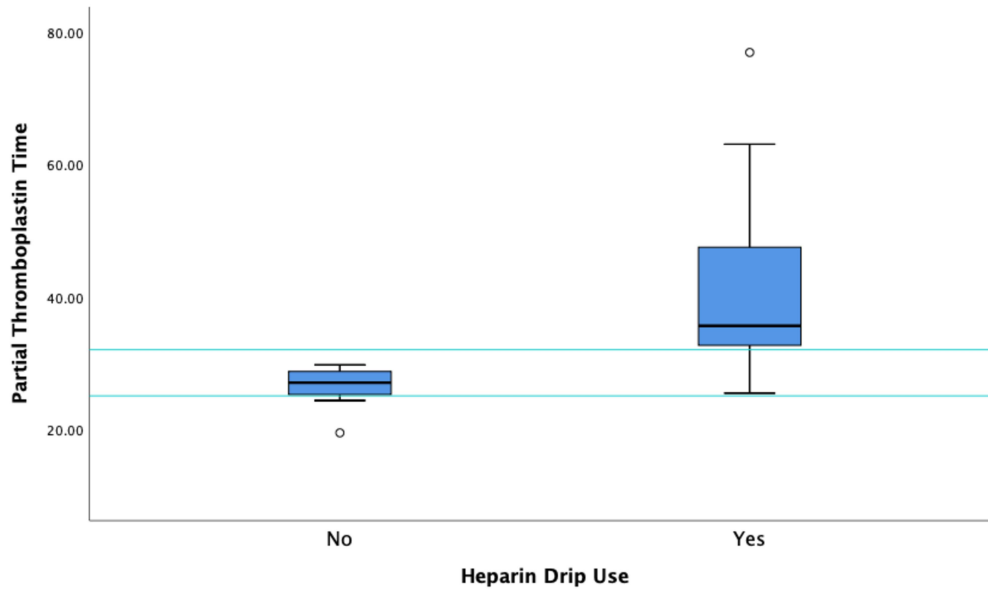

Supplement: tsaco-2020-000603supp003.pdf [file tsaco-2020-000603supp003.pdf]
