# Supplementary figures and images for: Serial rotational thromboelastography (ROTEM) in mechanically ventilated patients with COVID-19 demonstrates hypercoagulopathy despite therapeutic heparinization
Source: PubMed Central journal article supplement — Trauma Surg Acute Care Open. 2022 Mar 10;7(1):e000603. doi: 10.1136/tsaco-2020-000603 (PMC8914399; doi:10.1136/tsaco-2020-000603), 2022-03-10

**Supplemental Figure 1: ROTEM Parameters**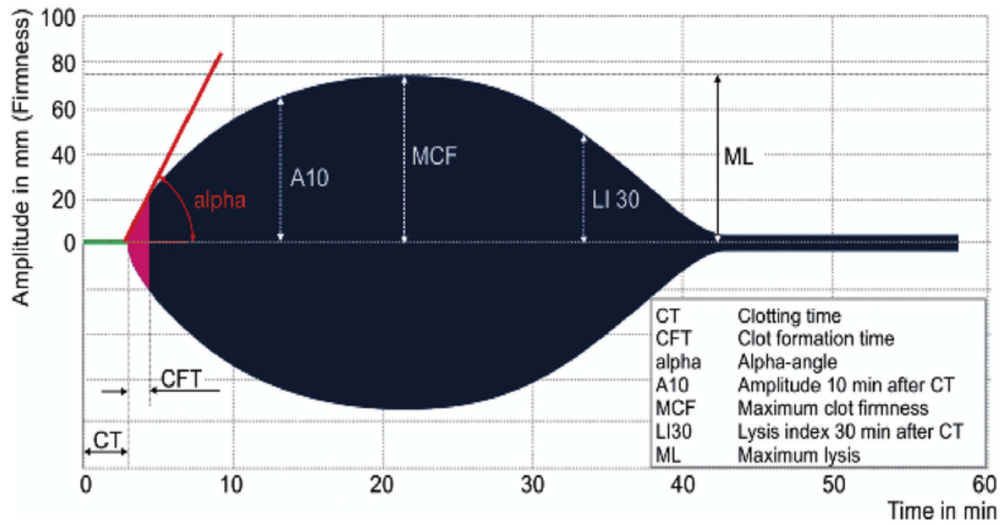

Supplement: tsaco-2020-000603supp001.pdf [file tsaco-2020-000603supp001.pdf]

**Supplemental Figure 2:** Legend for Figures 1-4

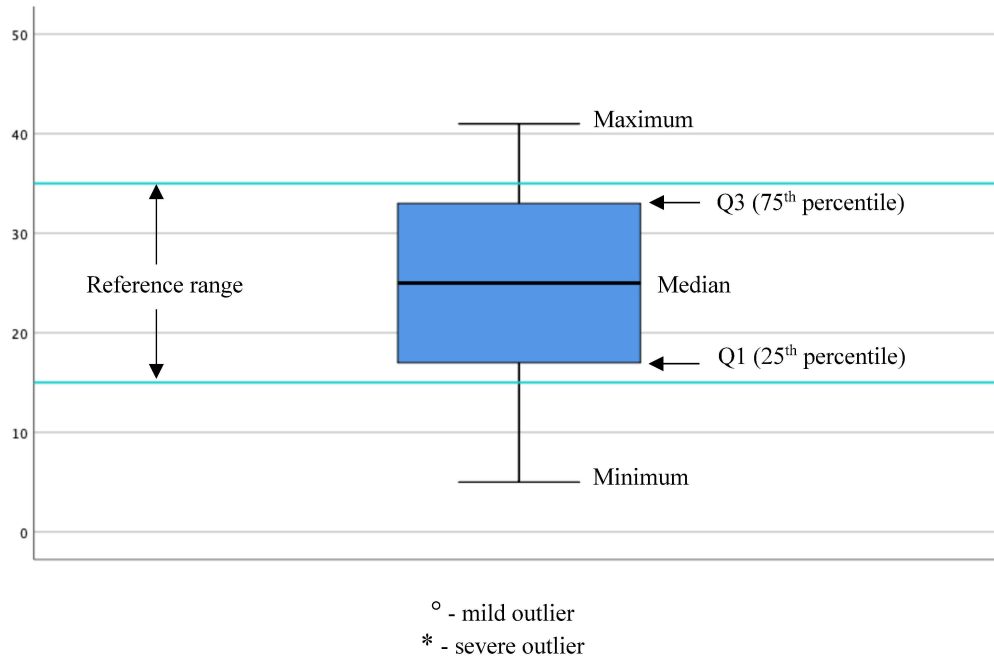

Supplement: tsaco-2020-000603supp002.pdf [file tsaco-2020-000603supp002.pdf]
